# Supplementary material for: Reconstructing Historical VOC Concentrations in Drinking Water for Epidemiological Studies at a U.S. Military Base: Summary of Results
Source: PubMed Central journal article supplement (PMC5580837; doi:10.3390/w8100449), 2016-10-13
Supplement: NIHMS897944-supplement-Supplental_Info.pdf [file NIHMS897944-supplement-Supplental_Info.pdf]

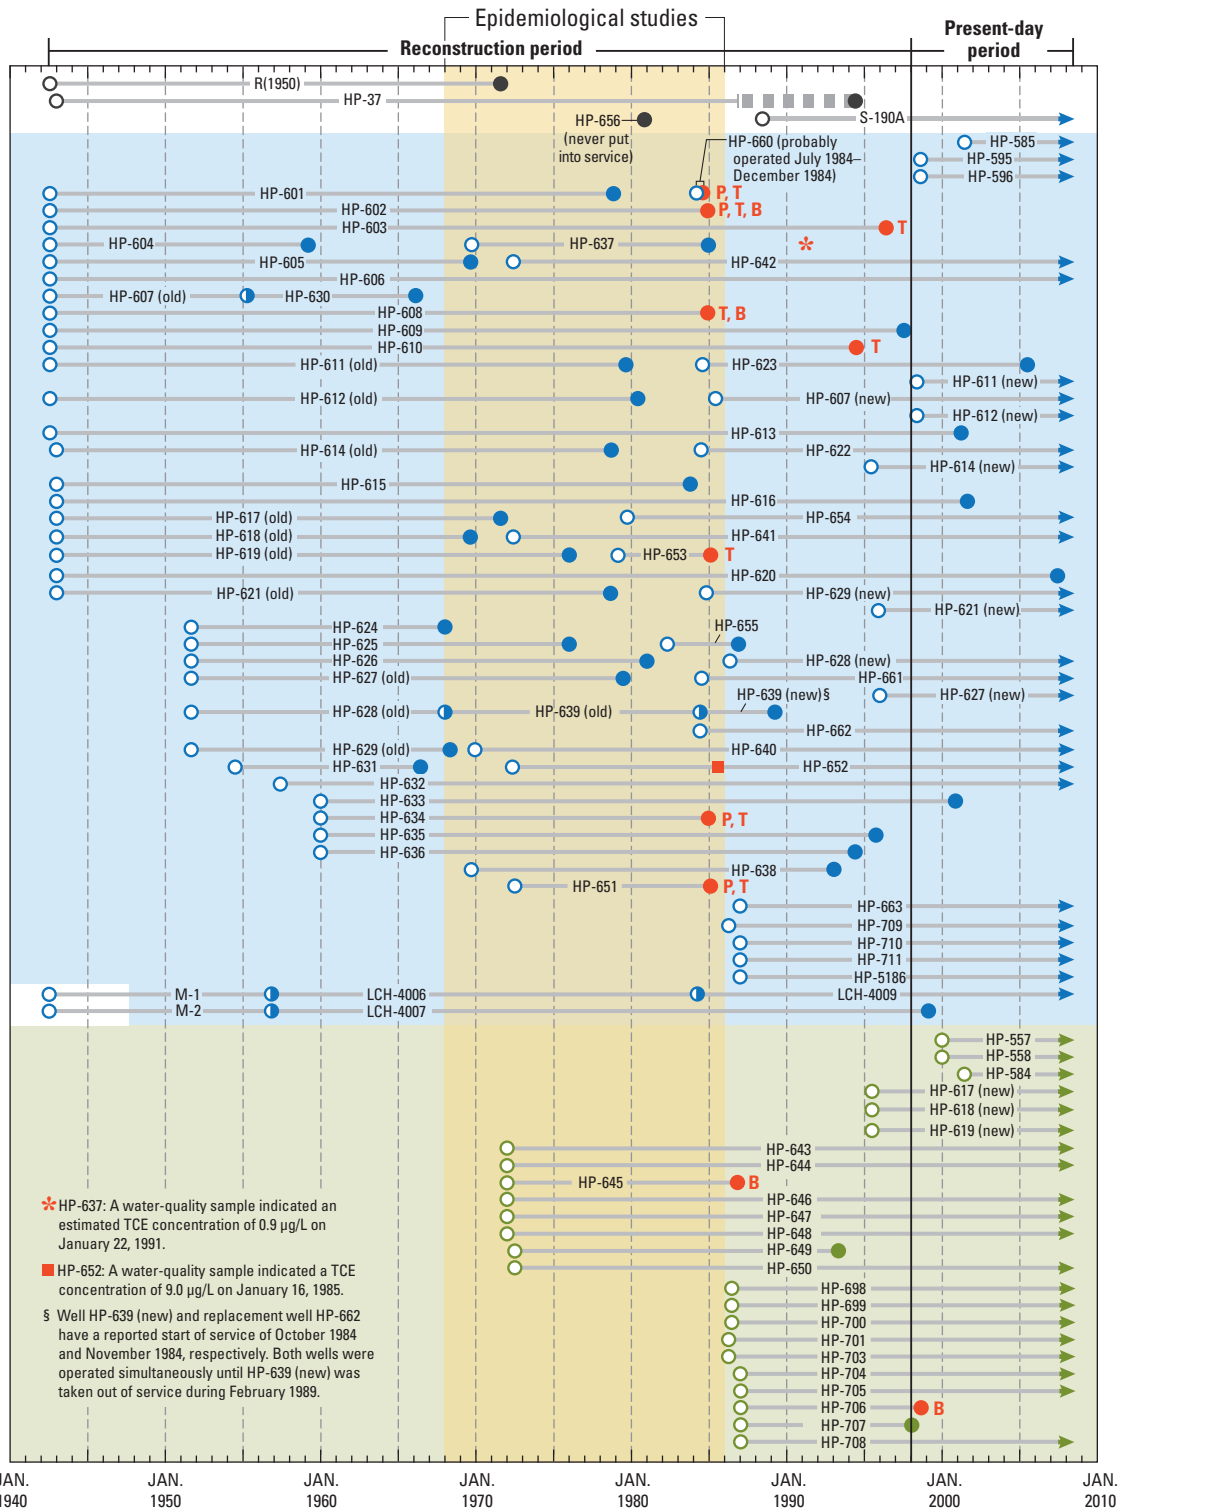

Figure S-1. Maslia et al. 2016

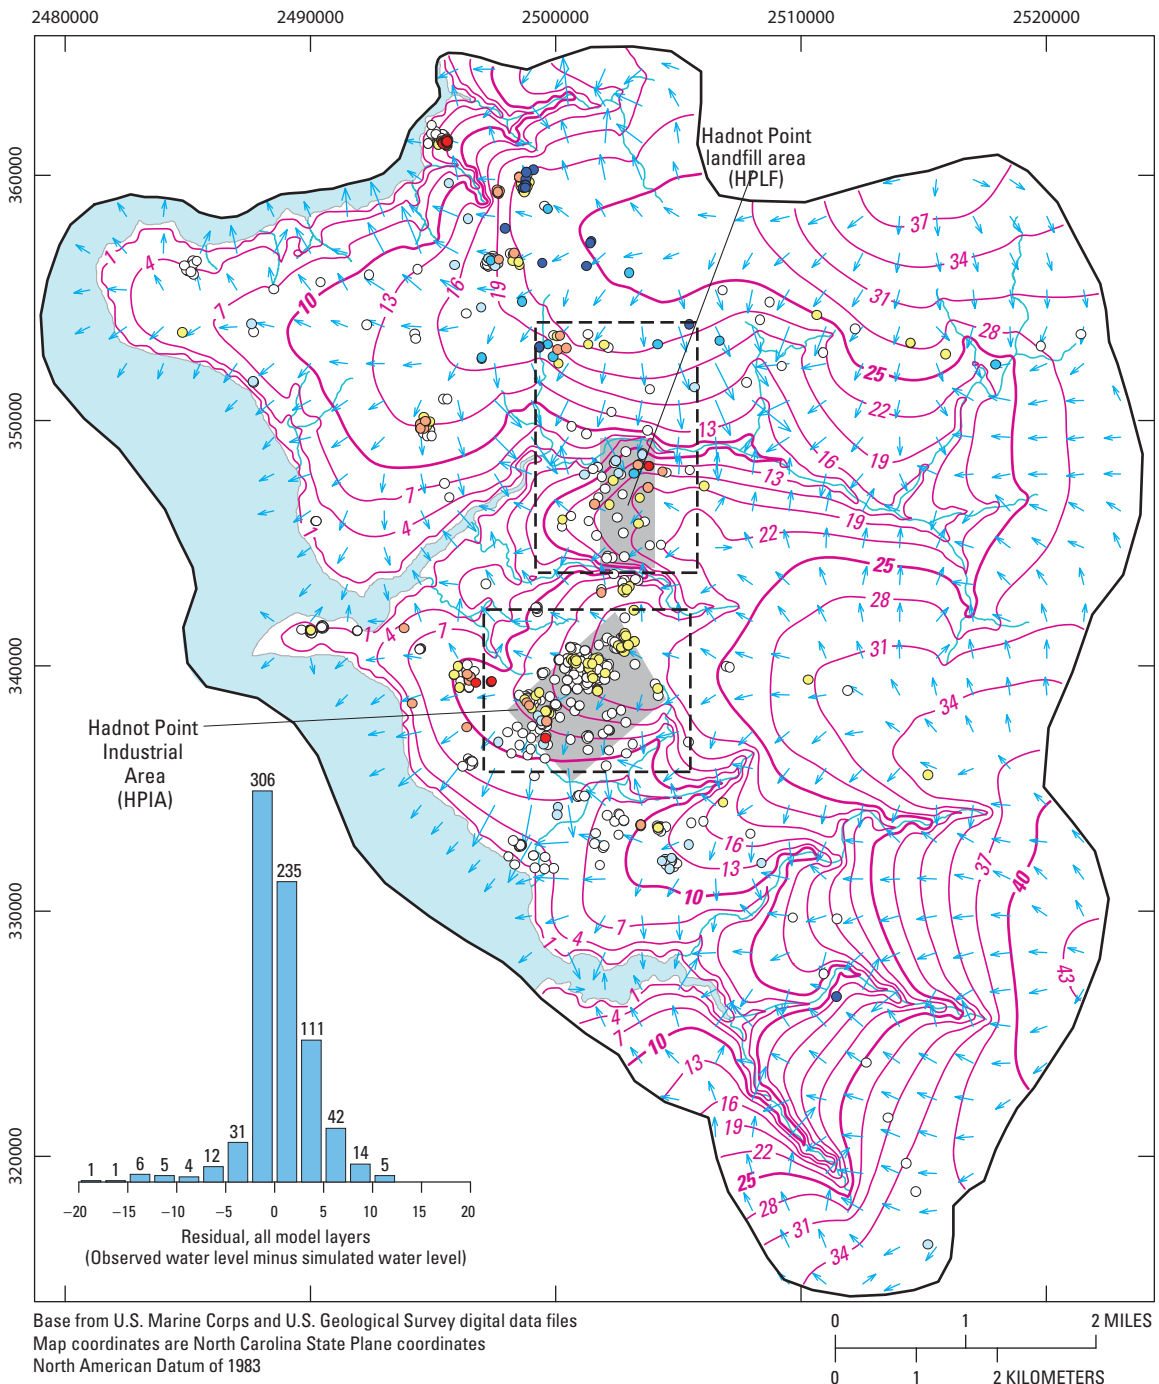

| EXPLANATION               |                                                                  | Residual statistics, all model layers |             |                           |            |
|---------------------------|------------------------------------------------------------------|---------------------------------------|-------------|---------------------------|------------|
| —                         | Active model domain                                              | ●                                     | >7.5        | Number of terms           | 773        |
| - - -                     | Contaminant fate and transport model subdomain                   | ●                                     | 5 to 7.5    | Minimum                   | -17.5 feet |
| <b>Simulation results</b> |                                                                  | ●                                     | 2.5 to 5    | Maximum                   | 11.5 feet  |
| — 10 —                    | Potentiometric contour—Contour interval 3 feet. Datum is NGVD 29 | ○                                     | 2.5 to -2.5 | Average residual          | 0.5 feet   |
| →                         | Direction of groundwater flow                                    | ○                                     | -2.5 to -5  | Standard deviation        | 3.34       |
|                           |                                                                  | ●                                     | -5 to -7.5  | Root-mean square residual | 3.39 feet  |
|                           |                                                                  | ●                                     | <-7.5       |                           |            |

Figure S-2. Maslia et al. 2016

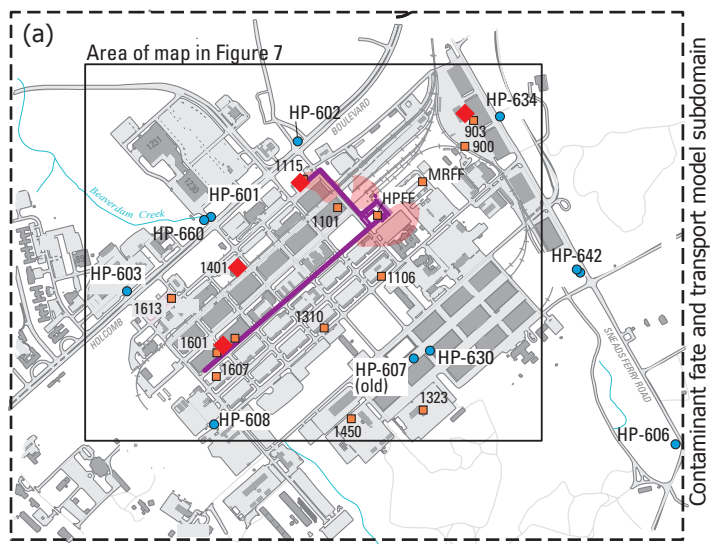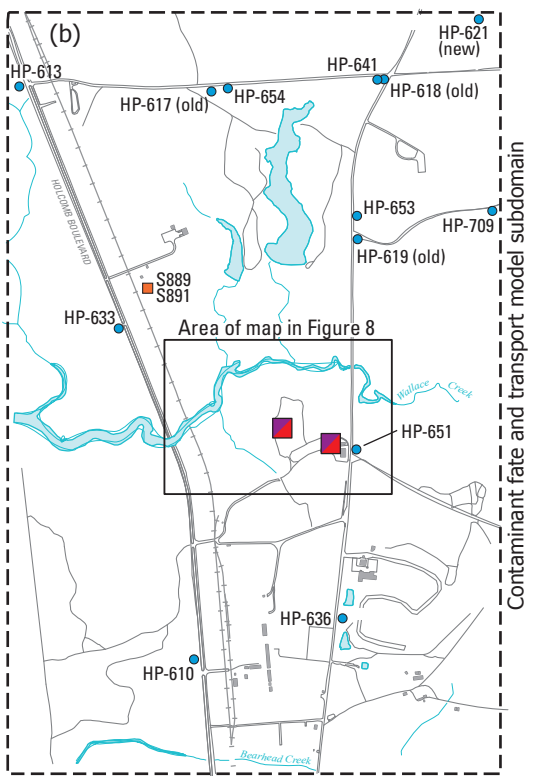

**EXPLANATION**

- Historical area of free product (fuel) measured in wells (approximate)
- Former location of fuel lines from the Hadnot Point fuel farm (HPFF)
- ◆ Trichloroethylene (TCE) source for fate and transport simulations (approximate locations)
- ◆ Tetrachloroethylene (PCE) source for fate and transport simulations (approximate locations)
- 900 Above-ground and underground storage tank and number and associated building number
- HP-634 Water-supply well and number

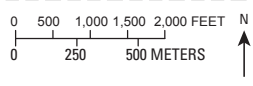

Figure S-3. Maslia et al. 2016

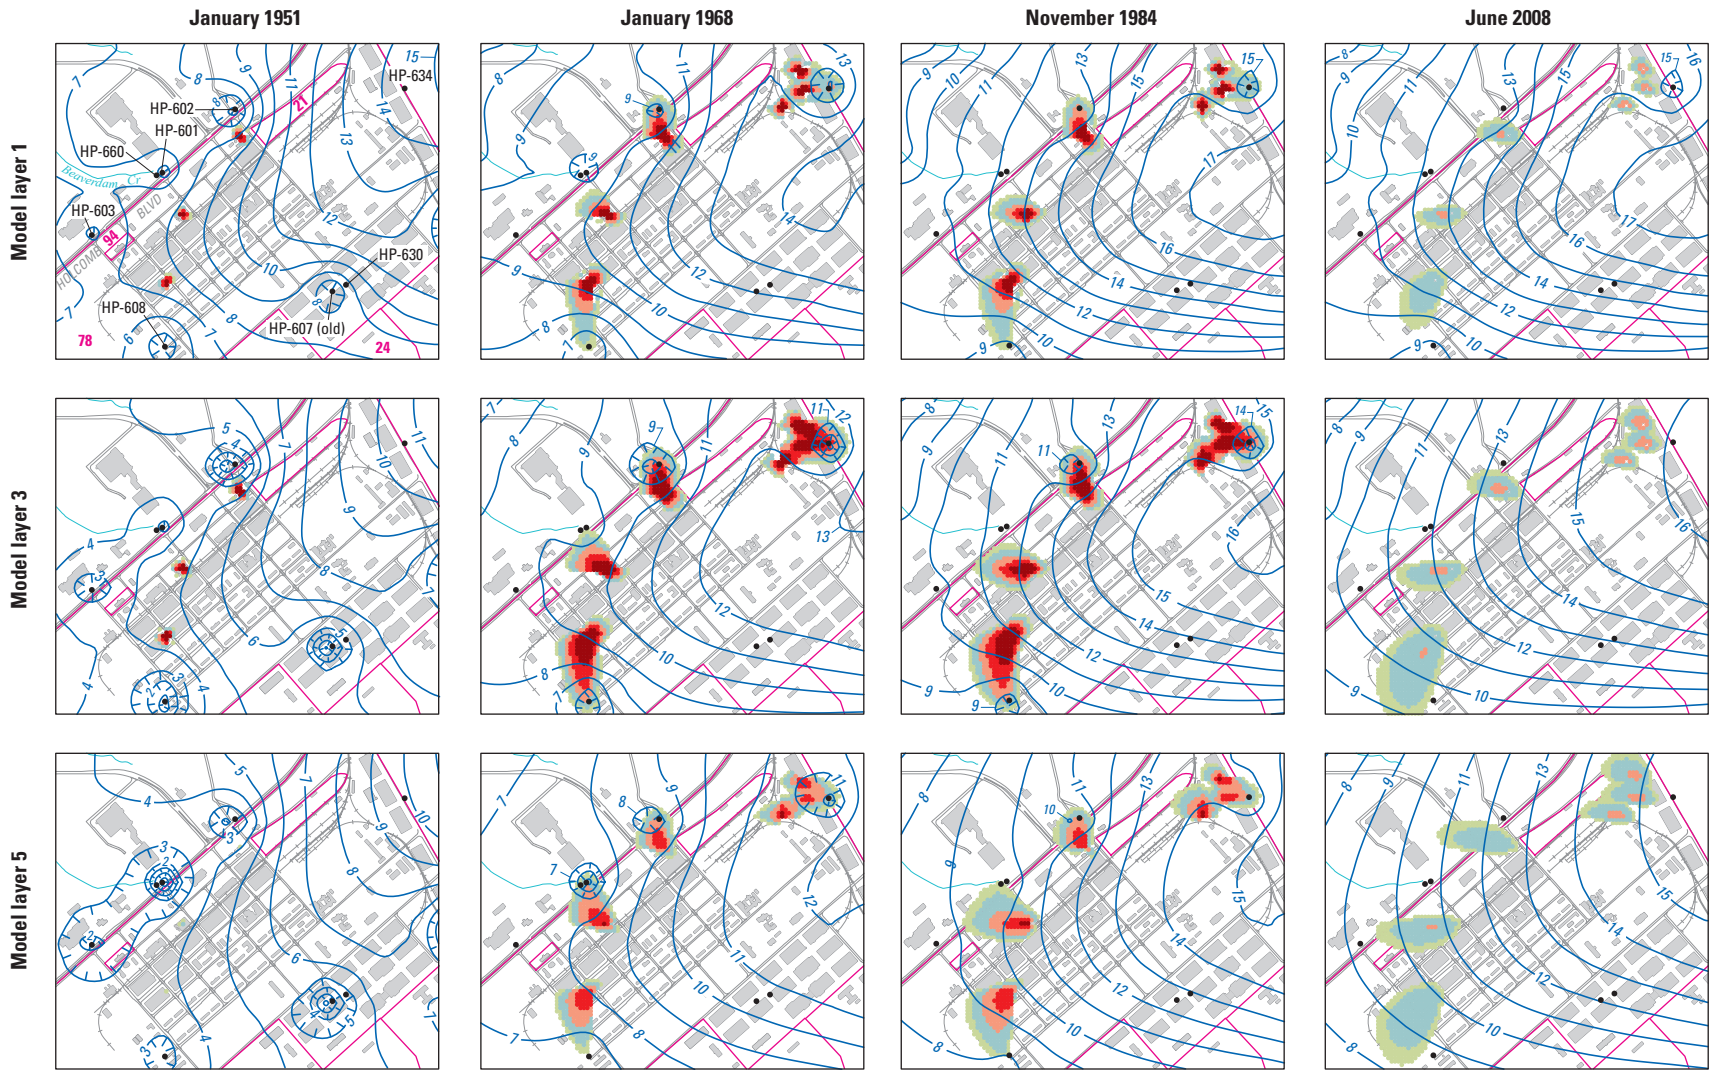

Base modified from U.S. Marine Corps digital data files

**78** Installation Restoration Program site boundary and number

● HP-634 Water-supply well and number

**8** Simulated potentiometric contour— Shows simulated potentiometric surface. Hachures indicate depression. Contour interval 1 foot. Datum is National Geodetic Vertical Datum of 1929

**EXPLANATION**

**TCE concentration, in micrograms per liter**

- 1 to 5
- Greater than 5 to 50
- Greater than 50 to 500
- Greater than 500 to 5,000
- Greater than 5,000 to 1,000,000

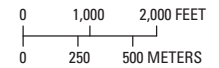

Figure S-4. Maslia et al. 2016

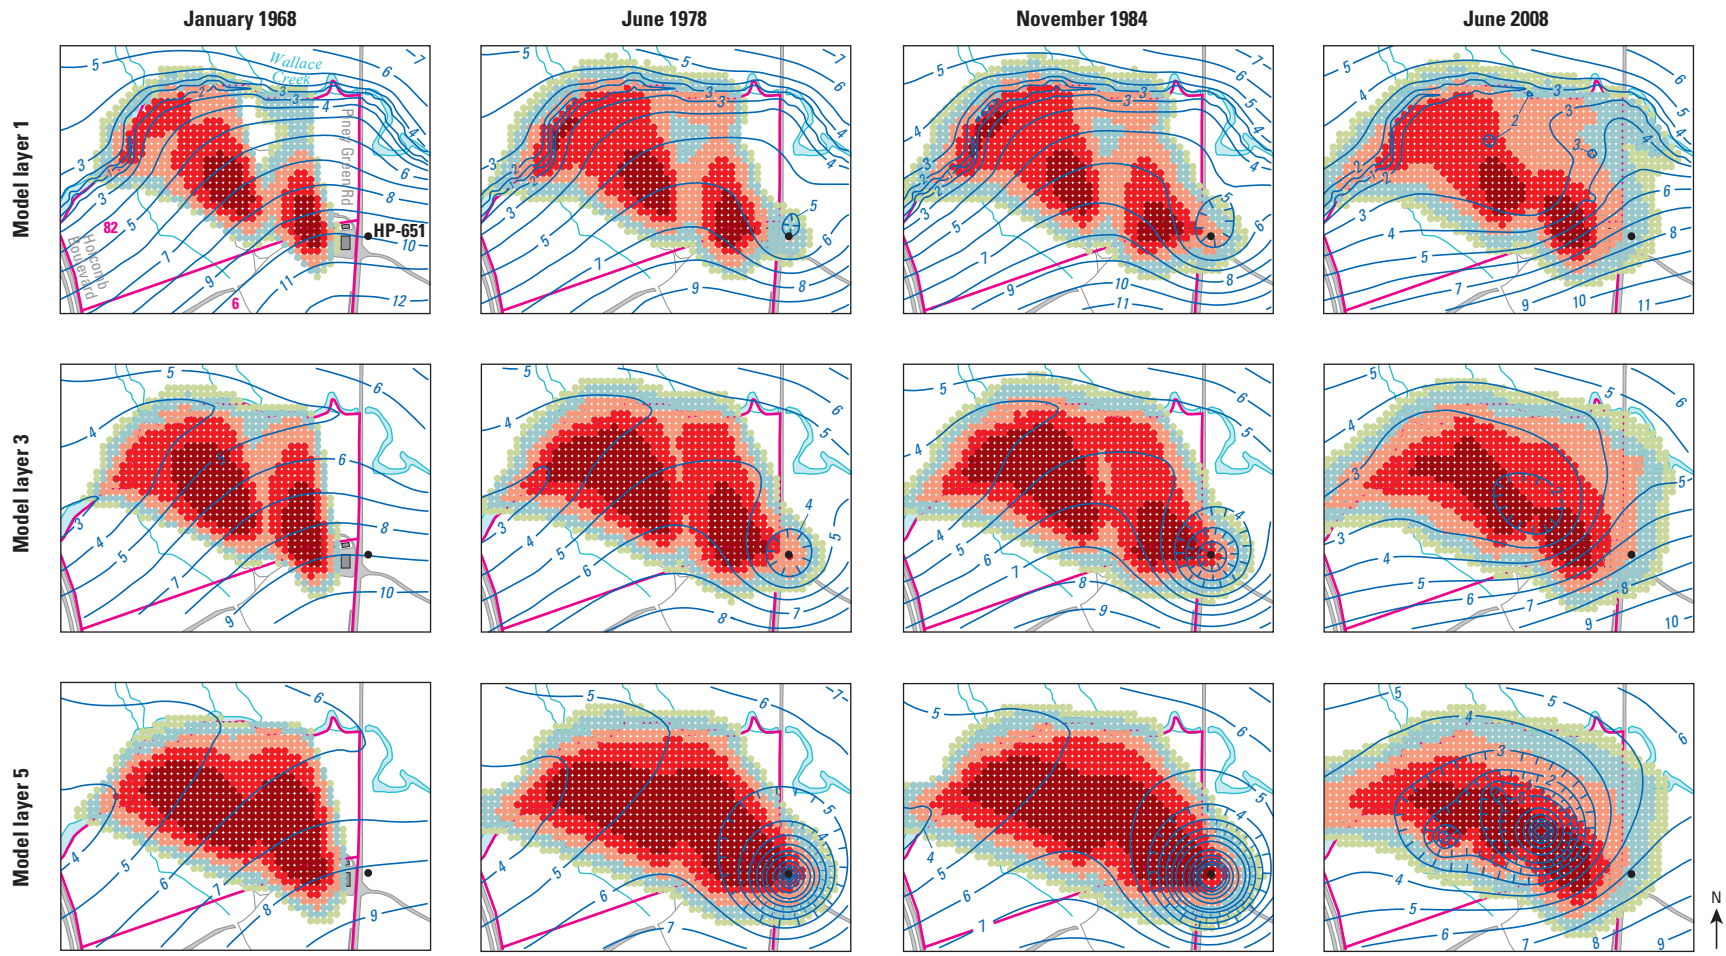

Base from U.S. Marine Corps and U.S. Geological Survey digital data files

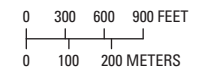

- EXPLANATION**
- 82 — Installation Restoration Program site boundary and number
  - HP-651 Pumping water-supply well and identification
  - 8 — Simulated potentiometric contour— Shows simulated potentiometric surface. Hachures indicate depression. Contour interval, in feet, is variable. Datum is National Geodetic Vertical Datum of 1929
  - 1 to 5
  - Greater than 5 to 50
  - Greater than 50 to 500
  - Greater than 500 to 5,000
  - Greater than 5,000 to 400,000

Figure S-5. Maslia et al. 2016

## Supplemental Information: Tables — Maslia et al. 2016

**Table S-1.** Chronology of selected events related to water supply and environmental contamination at U.S. Marine Corps Base Camp Lejeune, North Carolina, and vicinity. <sup>#,\*</sup>

| <b>Event</b>                                                                                                                                                                                                                                             | <b>Date or approximate date</b> |
|----------------------------------------------------------------------------------------------------------------------------------------------------------------------------------------------------------------------------------------------------------|---------------------------------|
| Hadnot Point water treatment plant (WTP) comes on line                                                                                                                                                                                                   | 1941–42                         |
| Tarawa Terrace WTP comes on line                                                                                                                                                                                                                         | 1952–53                         |
| Holcomb Boulevard WTP comes on line                                                                                                                                                                                                                      | June 1972                       |
| Several Tarawa Terrace and Hadnot Point water-supply wells shut down due to documented volatile organic compound (VOC) contamination                                                                                                                     | November 1984–February 1985     |
| Marston Pavilion interconnection valve opened and booster pump 742 continuously operated for eight days (because of shut down of Holcomb Boulevard WTP) to augment Holcomb Boulevard drinking-water supply with contaminated Hadnot Point drinking water | January 27–February 4, 1985     |
| Holcomb Boulevard WTP expanded to provide water to Tarawa Terrace and Camp Johnson water-distribution system areas                                                                                                                                       | 1987                            |
| Tarawa Terrace WTP and remaining operating supply wells shut down and taken out of service                                                                                                                                                               | March 1987                      |
| ABC One-Hour Cleaners placed on the USEPA’s National Priorities List (NPL) of contaminated sites                                                                                                                                                         | March 1989                      |
| USMCB Camp Lejeune placed on the USEPA’s NPL of contaminated sites                                                                                                                                                                                       | October 1989                    |

<sup>#</sup>Refer to [1,4] for details; <sup>\*</sup>see Figure 1 for location of water-supply areas.



|                                |         |         |         |         |         |         |         |
|--------------------------------|---------|---------|---------|---------|---------|---------|---------|
| Dispersivity (ft)              |         |         |         |         |         |         |         |
| Longitudinal, $\alpha_L$       | 25      | 25      | 25      | 25      | 25      | 25      | 25      |
| Transverse, $\alpha_T$         | 2.5     | 2.5     | 2.5     | 2.5     | 2.5     | 2.5     | 2.5     |
| Vertical, $\alpha_V$           | 0.25    | 0.25    | 0.25    | 0.25    | 0.25    | 0.25    | 0.25    |
| Source concentration, C (mg/L) |         |         |         |         |         |         |         |
| HPIA (TCE)                     | 640     | 640     | 640     | 640     | 640     | 640     | 640     |
| HPIA (benzene-dissolved)       | 1.7     | —       | —       | —       | —       | —       | —       |
| HPIA (benzene-LNAPL)           | 17      | —       | —       | —       | —       | —       | —       |
| HPLF (PCE)                     | 42–105  | 33–83   | 27–66   | 18–46   | 6–16    | 0       | 0       |
| HPLF (TCE)                     | 256–384 | 256–384 | 256–384 | 256–384 | 256–384 | 256–384 | 256–384 |

<sup>¶</sup>Refer to [31,35,36] for details;

<sup>\*</sup>Symbolic notation used to describe model parameters obtained from [34,37,38];

<sup>#</sup>See [1] for correlation between geologic and hydrogeologic units and model layers for the Hadnot Point and Holcomb Boulevard areas; refer to [32,35] for details; aquifers are designated as model layers 1, 3, 5, and 7; confining units are designated as model layers 2, 4, and 6;

<sup>§</sup>See Figure SI-2 for groundwater-flow model domain and contaminant fate and transport model subdomains;

<sup>++</sup> Specific storage ( $S_s$ ) was specified as input for MOFLOW-2005 [34]; based on cell-by-cell thicknesses, specific storage was varied to assure a constant storage coefficient (or storativity) of  $4 \times 10^{-4}$  using the equation  $S = S_s \times b$ , where  $S$  is the storage coefficient (dimensionless),  $S_s$  is specific storage (1/ft), and  $b$  is the cell thickness (ft);

<sup>##</sup>Transient infiltration was varied on a monthly basis using the ratio of monthly precipitation divided by average, long-term precipitation; [35] for details;

<sup>§§</sup>Pumpage varies by month and model cell; refer to [10,29] for details on the derivation of historical monthly water-supply well operations; refer to [35] for details pertaining to assigning monthly water-supply well pumpage to cells and model layers using the multi-node well-flow package for MODFLOW-2005;

<sup>\*\*\*</sup>Refer to [36] for derivation of  $K_D$  values based on a survey reported in the scientific literature; to convert from model  $K_D$  units of  $\text{ft}^3/\text{mg}$  to units of  $\text{L}/\text{kg}$  reported in [36], multiply model  $K_D$  values by 28,381,652.21.



**Table S-3.** Contaminant sources, locations, and durations used for historical reconstruction of TCE, PCE, and benzene concentrations in groundwater at U.S. Marine Corps Base Camp Lejeune, North Carolina <sup>#, ¶</sup>.

| Source Location                                   | Contaminant         | Source concentration (µg/L) <sup>+</sup> | Number of model sources <sup>§</sup> | Source duration     |
|---------------------------------------------------|---------------------|------------------------------------------|--------------------------------------|---------------------|
| <b>Hadnot Point Industrial Area (Figure SI3a)</b> |                     |                                          |                                      |                     |
| Building 900 area                                 | TCE                 | 640                                      | 3                                    | Jan. 1957–Dec. 1994 |
| Building 1115                                     | TCE                 | 640                                      | 1                                    | Jan. 1951–Jun. 1993 |
| Building 1401                                     | TCE                 | 640                                      | 1                                    | Jan. 1951–Dec. 1993 |
| Building 1601                                     | TCE                 | 640                                      | 1                                    | Jan. 1951–Jun. 1993 |
| Building 1601                                     | Benzene (dissolved) | 1.7                                      | 1                                    | Jan. 1951–Dec. 1994 |
| Building 1613                                     | Benzene (LNAPL)**   | 17                                       | Multiple**                           | Jan. 1964–Jun. 2008 |
| Hadnot Point fuel farm                            | Benzene (LNAPL)**   | 17                                       | Multiple**                           | Jan. 1951–Jun. 2008 |
| <b>Hadnot Point landfill area (Figure SI3b)</b>   |                     |                                          |                                      |                     |
| Source 1 <sup>++</sup>                            | TCE                 | 256–384 <sup>‡</sup>                     | 2                                    | Jan. 1948–Jun. 2008 |
| Source 2 <sup>++</sup>                            | PCE                 | 6–105 <sup>‡</sup>                       | 2                                    | Jan. 1948–Jun. 2008 |

<sup>#</sup>See [1] for complete details.

<sup>¶</sup>All model sources are specified concentration; model simulation time is January 1942–June 2008; refer to [31,36] for details.

<sup>+</sup>Current maximum contaminant level (MCL) for TCE, PCE, and benzene is 5 µg/L; density (20°C): TCE, 1.464 g/cm<sup>3</sup>; PCE, 1.623 g/cm<sup>3</sup>; benzene, 0.876 g/cm<sup>3</sup> [2]; solubility in water (25°C): TCE, 1,280 mg/L; PCE, 210 mg/L; benzene, 1,780 mg/L [2].

<sup>§</sup> Refer to [31,36] for details.

<sup>\*\*</sup>Benzene source for model is areally distributed based on LNAPL distribution; refer to [31] for details.

<sup>++</sup>There are no designated building numbers within the Hadnot Point landfill; location of sources based on Installation Restoration Program Site 82 history and contaminant analyses [9] and model calibration [36].

<sup>‡</sup>Source concentration values vary by model layer, refer to [1 (Table A12),31,36] for details.

**Table S-4.** Types of sensitivity analyses applied to models and parameters (from [1]).

| TYPE OF SIMULATION MODEL | TYPE OF VARIATION              |                                                                                                                                                        |                                                               |
|--------------------------|--------------------------------|--------------------------------------------------------------------------------------------------------------------------------------------------------|---------------------------------------------------------------|
|                          |                                |                                                                                                                                                        |                                                               |
| TYPE OF SIMULATION MODEL | Groundwater flow               | Physical parameters<br>Historical monthly pumping: $Q_{monthly}$<br>Input parameters/hydraulics: $K_{xx}$                                              | Numerical parameters<br>Cell size: $\Delta x, \Delta y$       |
|                          | Contaminant fate and transport | Input parameters/fate and transport: $\rho, nE, \alpha_L, K_D, \lambda, C$<br>Benzene source area and release<br>Trichloroethylene source-release date | Cell size: $\Delta x, \Delta y$<br>Time-step size: $\Delta t$ |
|                          | Water distribution system*     | Pipe roughness: C-factor<br>Storage-tank mixing                                                                                                        | Demand factor                                                 |

\*Sensitivity analyses using water-distribution system model conducted as part of the Tarawa Terrace study area [46].
